# Supplementary material
Source: PubMed Central journal article supplement (PMC3185883)
Supplement: jcbfm201162x5.pdf [file jcbfm201162x5.pdf]

Table S1. Physiological variables

| Experimental group             | MABP<br>(mm Hg) | pH          | PaCO <sub>2</sub><br>(mm Hg) | PaO <sub>2</sub><br>(mm Hg) | Glucose<br>(mM) | Hematocrit<br>(%) |
|--------------------------------|-----------------|-------------|------------------------------|-----------------------------|-----------------|-------------------|
| Study 1a. CBF threshold (n=8)  |                 |             |                              |                             |                 |                   |
| Pre-occlusion                  | 108 ± 10        | 7.43 ± 0.03 | 38 ± 2                       | 131 ± 14                    | 6.5 ± 1.1       | 52 ± 2            |
| Study 1b. Histopathology (n=5) |                 |             |                              |                             |                 |                   |
| Pre-occlusion                  | 122 ± 10        | 7.39 ± 0.03 | 41 ± 4                       | 127 ± 14                    | 4.9 ± 0.2       | 51 ± 1            |
| 1 h                            | 139 ± 13        | 7.38 ± 0.02 | 40 ± 1                       | 120 ± 8                     | 4.8 ± 0.7       | 51 ± 2            |
| 2 h                            | 129 ± 19        | 7.41 ± 0.05 | 37 ± 3                       | 118 ± 16                    | 5.6 ± 1.0       | 50 ± 1            |
| 3 h                            | 122 ± 14        | 7.42 ± 0.03 | 38 ± 5                       | 123 ± 14                    | 5.9 ± 0.3       | 49 ± 4            |
| Study 2. Metabolites (n=14)    |                 |             |                              |                             |                 |                   |
| Pre-occlusion                  | 101 ± 7         | 7.39 ± 0.03 | 39 ± 3                       | 138 ± 10                    | 5.0 ± 0.8       | 50 ± 2            |
| 1 h                            | 112 ± 9         | 7.36 ± 0.03 | 40 ± 4                       | 130 ± 11                    | 4.8 ± 0.7       | 50 ± 2            |
| Study 3. Perfusion imaging     |                 |             |                              |                             |                 |                   |
| Halothane (n=7)                |                 |             |                              |                             |                 |                   |
| Pre-occlusion                  | 118 ± 10        | 7.38 ± 0.02 | 37 ± 3                       | 125 ± 13                    | 5.6 ± 0.6       | --                |
| 1 h                            | 117 ± 7         | 7.35 ± 0.02 | 40 ± 3                       | 113 ± 18                    | 5.3 ± 0.8       | --                |
| 4 h                            | 111 ± 5         | 7.37 ± 0.02 | 39 ± 3                       | 107 ± 9                     | 5.0 ± 0.5       | --                |
| Isoflurane/α-chloralose (n=9)  |                 |             |                              |                             |                 |                   |
| Pre-occlusion                  | 126 ± 11        | 7.39 ± 0.03 | 37 ± 2                       | 115 ± 8                     | 6.5 ± 0.6       | --                |
| 1 h                            | 125 ± 6         | 7.37 ± 0.03 | 36 ± 2                       | 118 ± 9                     | 5.1 ± 0.9       | --                |
| 4 h                            | 116 ± 7         | 7.34 ± 0.03 | 39 ± 3                       | 111 ± 7                     | 5.2 ± 0.8       | --                |
